# Supplementary material
Source: publisher figshare collection journal article supplement (https://diabetesjournals.figshare.com/articles/dataset/_/14473782)

**Figure 1.** Participant flow chart. Numbers of participants in the high-protein low-glycemic diet and moderate protein moderate glycemic diet groups are given. Intervention groups were not different with regard to their psychobehavioral variables. Therefore, analysis was based on complete data for HOMA-IR, eating behavior, physical activity, sleep and stress related assessments.

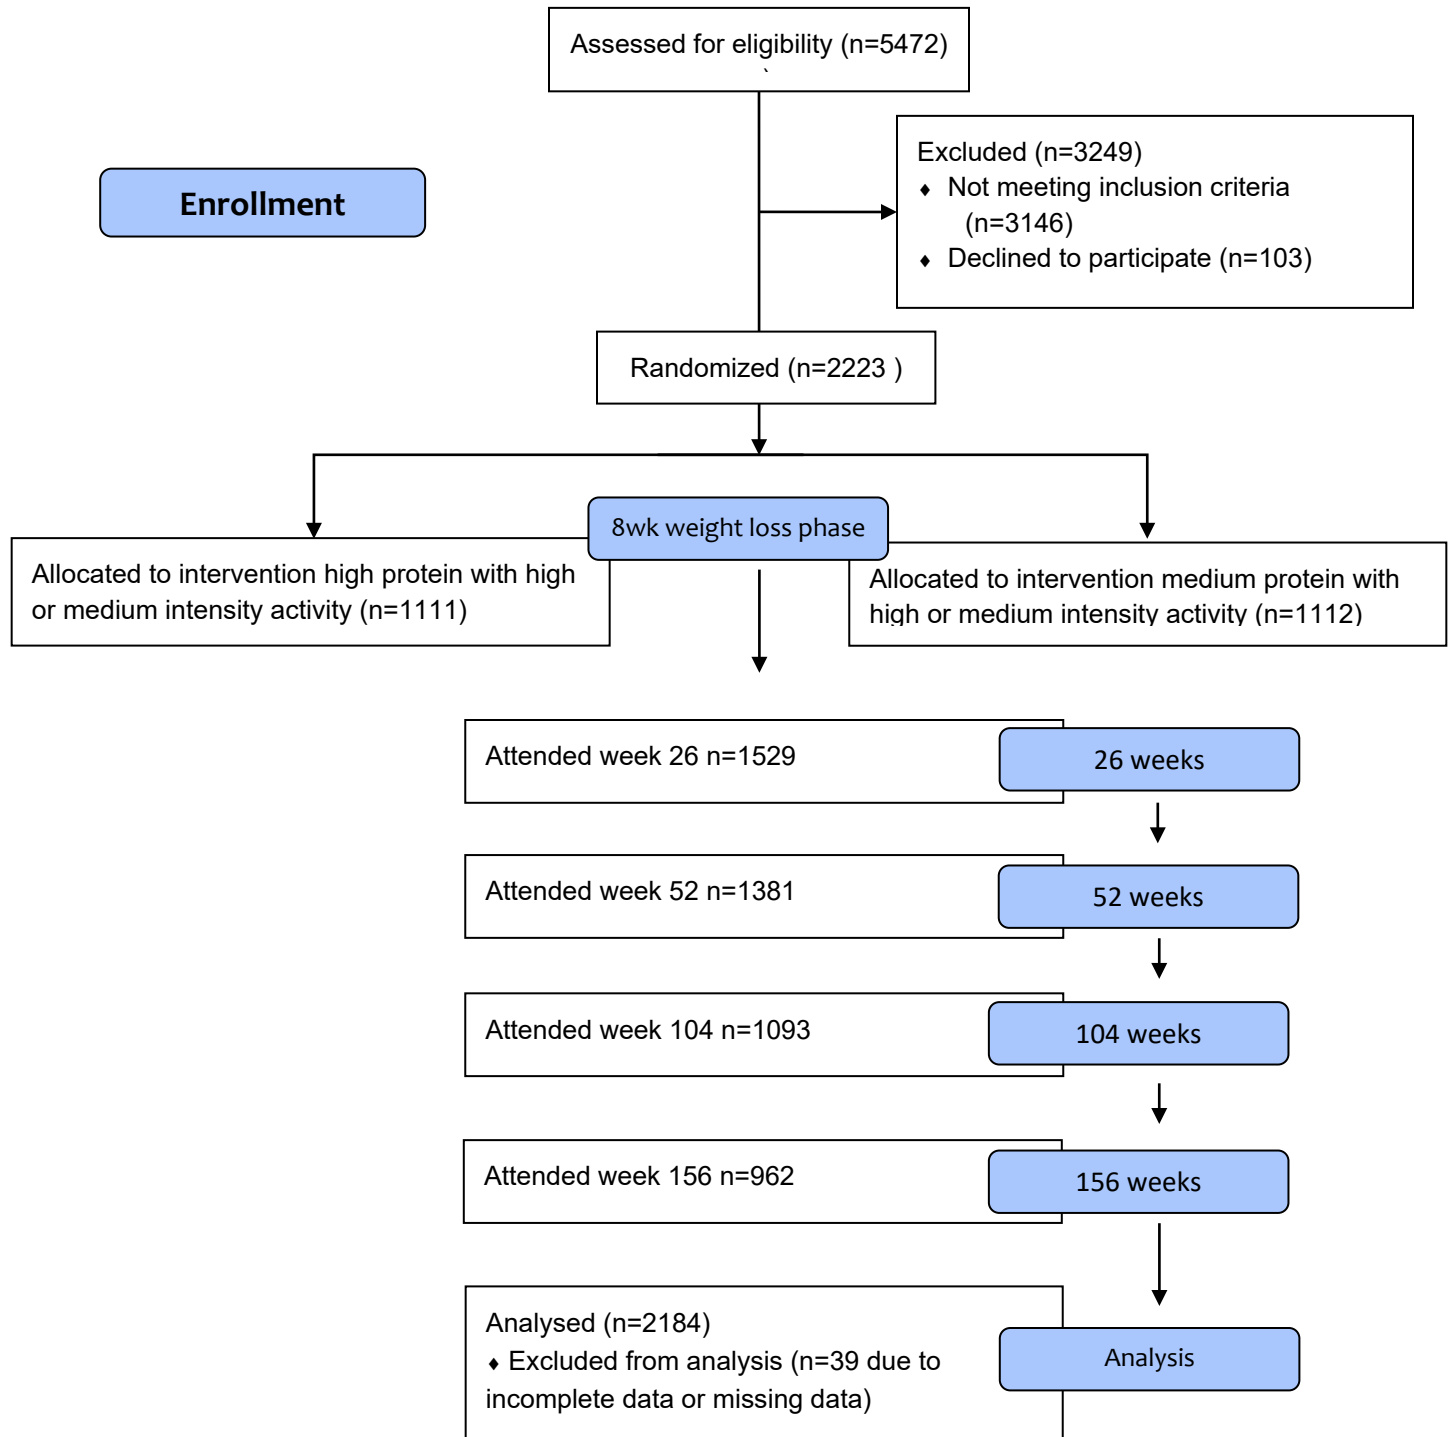

Supplement: Supplementary file 1 [file 2]
