# Supplementary material
Source: publisher figshare collection journal article supplement (https://diabetesjournals.figshare.com/articles/dataset/_/14473782)
Supplement: Supplementary file 2 [file 2]

Table 1A. Estimated means (EM) and confidence interval (CI) of BMI, HOMA-IR, physical activity expressed as Baecke sport- and Baecke leisure scores, eating behavior variables (TFEQ), sleep characteristics (PSQI, ESS, Sleep duration), stress (PSS) and total mood-disturbance (POMS-tmd), as determined by mixed modeling analysis for women (n=1478) throughout the PREVIEW lifestyle intervention study

|                                    | Baseline<br>(n=1478) |             | 6 months<br>(n=1011) |           | Year 1<br>(n=815) |            | Year 2<br>(n=658) |             | Year 3<br>(n=610) |             |
|------------------------------------|----------------------|-------------|----------------------|-----------|-------------------|------------|-------------------|-------------|-------------------|-------------|
|                                    | EM                   | 95% CI      | EM                   | 95% CI    | EM                | 95% CI     | EM                | 95% CI      | EM                | 95% CI      |
| <b>BMI (kg/m<sup>2</sup>)</b>      | 36                   | 33.75-38.24 | 32.06*               | 29.8-34.3 | 33.11*            | 30.8-35.35 | 34.17*            | 31.93-36.41 | 34.78*            | 32.54-37.02 |
| <b>HOMA-IR</b>                     | 3.52                 | 3.33-3.72   | 2.28*                | 2.08-2.47 | 2.51*             | 2.32-2.7   | 2.82*             | 2.62-3.02   | 3.13*             | 2.92-3.33   |
| <b>Baecke_sport</b>                | 2.1                  | 1.83-2.37   | 2.5*                 | 2.22-2.77 | 2.47*             | 2.2-2.74   | 2.42*             | 2.25-2.69   | 2.41*             | 2.14-2.68   |
| <b>Baecke_leisure</b>              | 2.53                 | 2.31-2.74   | 2.88*                | 2.67-3.1  | 2.81*             | 2.6-3.03   | 2.81*             | 2.59-3.02   | 2.77*             | 2.56-2.98   |
| <b>Accelerometers Counts (Cpm)</b> | 289                  | 269-309     | 319*                 | 300-339.3 | 313*              | 293-332    | 306*              | 286-326     | 288               | 268-308     |
| <b>TFEQ-F1</b>                     | 8.3                  | 7.4-9.3     | 13.6*                | 12.6-14.5 | 12.91*            | 11.9-13.85 | 12.21*            | 11.27-13.15 | 11.83*            | 10.89-12.77 |
| <b>TFEQ-F2</b>                     | 9.6                  | 9.12-10.18  | 7.7*                 | 7.24-8.31 | 8.31*             | 7.78-8.84  | 8.6*              | 8.11-9.17   | 8.66*             | 8.13-9.2    |
| <b>TFEQ-F3</b>                     | 7.21                 | 6.63-7.79   | 5.2*                 | 4.64-5.8  | 5.69*             | 5.11-6.26  | 6.0*              | 5.42-6.57   | 6.0*              | 5.42-6.58   |
| <b>PSQI</b>                        | 6.72                 | 6.41-7.04   | 5.98*                | 5.67-6.3  | 6.43*             | 6.11-6.76  | 6.52              | 6.19-6.84   | 6.53              | 6.2-6.86    |
| <b>ESS</b>                         | 7.6                  | 6.71-8.5    | 6.96*                | 6.07-7.86 | 7.03*             | 6.13-7.92  | 7.1*              | 6.21-8.0    | 7.1*              | 6.21-8.0    |
| <b>Sleep duration (min)</b>        | 480.3                | 469-490     | 476.3                | 465-486   | 489               | 478-500    | 520.5*            | 509-531     | 483               | 472-494     |
| <b>PSS</b>                         | 14.98                | 13.21-16.58 | 15.0                 | 13.3-16.6 | 15.9*             | 14.2-17.6  | 16.9*             | 15.2-18.6   | 16.5*             | 14.8-18.2   |
| <b>POMS tmd</b>                    | 20.64                | 15.3-25.9   | 17.5*                | 12.2-22.8 | 17.8*             | 12.5-23.1  | 17.4*             | 12.0-22.7   | 19.9              | 14.6-25.3   |

BMI (Body Mass Index); HOMA-IR (Homeostatic Model Assessment for Insulin resistance); BAECKE Sport (Baecke Physical Activity Questionnaire Sport); BAECKE Leisure ((Baecke Physical Activity Questionnaire Leisure); TFEQ-F1 (Three Factor Eating Questionnaire cognitive restraint); TFEQ-F2 (Three Factor Eating Questionnaire disinhibition); TFEQ-F3 (Three Factor Eating Questionnaire hunger); PSQI (Pittsburgh sleep quality index); ESS (Epworth sleepiness scale); Cpm (Counts per minute activity assessed with accelerometry); PSS (Perceived Stress Scale); POMS tmd (Profile of Mood Scores Total Mood Disturbance). \*significantly different from baseline at p<0.05

Table 1B. Estimated means (EM) and confidence interval (CI) of BMI, HOMA-IR, physical activity expressed as Baecke sport- and Baecke leisure scores, eating behavior variables (TFEQ), sleep characteristics (PSQI, ESS, Sleep duration), stress (PSS) and total mood-disturbance (POMS-tmd), as determined by mixed modeling analysis for men (n=706) throughout the PREVIEW lifestyle intervention study

|                                    | Baseline<br>(n=706) |           | 6 months<br>(n=534) |           | Year 1<br>(n=441) |            | Year 2<br>(n=372) |           | Year 3<br>(n=350) |           |
|------------------------------------|---------------------|-----------|---------------------|-----------|-------------------|------------|-------------------|-----------|-------------------|-----------|
|                                    | EM                  | 95% CI    | EM                  | 95% CI    | EM                | 95% CI     | EM                | 95% CI    | EM                | 95% CI    |
| <b>BMI (kg/m<sup>2</sup>)</b>      | 34.4                | 30.4-38.5 | 30.4*               | 26.3-34.5 | 31.2*             | 27.28-35.3 | 32.2*             | 28.2-36.2 | 32.5*             | 28.5-36.4 |
| <b>HOMA-IR</b>                     | 4.23                | 4.02-2.23 | 2.32*               | 2.31-2.54 | 2.77*             | 2.6-2.9    | 2.94*             | 2.78-3.1  | 3.1*              | 2.89-3.28 |
| <b>Baecke_sport</b>                | 2.3                 | 2.1-2.6   | 2.7*                | 2.4-3.0   | 2.7*              | 2.4-2.9    | 2.7*              | 2.4-2.9   | 2.7*              | 2.4-2.9   |
| <b>Baecke_leisure</b>              | 2.6                 | 2.3-2.9   | 2.9*                | 2.6-3.3   | 2.9*              | 2.6-3.3    | 2.9*              | 2.5-3.2   | 2.9*              | 2.5-3.3   |
| <b>Accelerometers Counts (Cpm)</b> | 298                 | 238-357   | 348*                | 293-402   | 332*              | 280-385    | 325*              | 272-378   | 318*              | 267-368   |
| <b>TFEQ-F1</b>                     | 6.9                 | 6.6-7.2   | 13.4*               | 13.1-13.7 | 12.8*             | 12.4-13.1  | 11.9*             | 11.6-12.4 | 11.9*             | 11.6-12.4 |
| <b>TFEQ-F2</b>                     | 8.0                 | 6.8-9.2   | 6.5*                | 5.3-7.6   | 6.7*              | 5.5-7.7    | 6.8*              | 5.7-7.9   | 6.7*              | 5.6-7.8   |
| <b>TFEQ-F3</b>                     | 6.6                 | 5.7-7.6   | 4.7*                | 3.7-5.5   | 4.9*              | 4.1-5.7    | 4.9*              | 4.2-5.7   | 5.0*              | 4.2-5.8   |
| <b>PSQI</b>                        | 6.1                 | 5.3-6.7   | 5.3*                | 4.5-6.0   | 5.5*              | 4.8-6.2    | 5.8*              | 5.1-6.4   | 5.6*              | 4.9-6.2   |
| <b>ESS</b>                         | 8.1                 | 5.8-10.5  | 7.2*                | 4.9-9.6   | 7.4*              | 5.1-9.7    | 7.3*              | 5.0-9.5   | 7.5*              | 5.3-9.8   |
| <b>Sleep duration (min)</b>        | 475.3               | 432-517   | 472                 | 431-512   | 484               | 446-522    | 511*              | 474-549   | 500*              | 464-537   |
| <b>PSS</b>                         | 12.4                | 8.4-16.3  | 12.3                | 8.4-16.2  | 12.6*             | 8.7-16.5   | 14.1*             | 10.4-17.8 | 13.0*             | 9.2-16.8  |
| <b>POMS tmd</b>                    | 14.1                | 5.3-22.9  | 11.9*               | 3.3-20.5  | 14.3              | 6.7-21.9   | 13.3              | 5.5-21.1  | 14.4              | 6.8-21.9  |

BMI (Body Mass Index); HOMA-IR (Homeostatic Model Assessment for Insulin resistance); BAECKE Sport (Baecke Physical Activity Questionnaire Sport); BAECKE Leisure ((Baecke Physical Activity Questionnaire Leisure); TFEQ-F1 (Three Factor Eating Questionnaire cognitive restraint); TFEQ-F2 (Three Factor Eating Questionnaire disinhibition); TFEQ-F3 (Three Factor Eating Questionnaire hunger); PSQI (Pittsburgh sleep quality index); ESS (Epworth sleepiness scale); Cpm (Counts per minute activity assessed with accelerometry); PSS (Perceived Stress Scale); POMS tmd (Profile of Mood Scores Total Mood Disturbance). \*significantly different from baseline at p<0.05.
